# Supplementary material for: Structural basis for recognition of N-formyl peptides as pathogen-associated molecular patterns
Source: PubMed Central journal article supplement (PMC9445081; doi:10.1038/s41467-022-32822-y), 2022-09-05
Supplement: 41467_2022_32822_MOESM2_ESM.pdf [file 41467_2022_32822_MOESM2_ESM.pdf]

## **Description of Additional Supplementary Files**

File name: Supplementary Data 1

Description: The PDB file of docking complex of MLF-FPR1

File name: Supplementary Data 2

Description: The PDB file of docking complex of tBOC-MLF-FPR1

File name: Supplementary Data 3

Description: The PDB file of docking complex of WKYMVm-FPR1

File name: Supplementary Data 4

Description: The PDB file of docking complex of AG14-FPR1

File name: Supplementary Data 5

Description: The PDB file of docking complex of compound17b-FPR1
